# Supplementary material for: The small heat shock protein αB-Crystallin protects versus withaferin A-induced apoptosis and confers a more metastatic phenotype in cisplatin-resistant ovarian cancer cells
Source: PLoS One. 2023 Jan 26;18(1):e0281009. doi: 10.1371/journal.pone.0281009 (PMC9879449; doi:10.1371/journal.pone.0281009)
Supplement: S1 File — (XLSX) [file pone.0281009.s002.xlsx]

## Sheet: 1eAlphaBDensitometryOVCAR8R
% WA control		n=1	n=2	n=3	AVERAGE	ST ERROR
	0	100	100	100	100	0
	1	180.491	58.9311	157.995	132.472	64.6743
	2.5	80.0133	112.126	217.839	136.66	72.1137
	5	206.474	197.897	221.654	208.675	12.0306
	7.5	434.473	135.946	272.668	281.029	149.439
		0	1	2.5	5	7.5
	% of 0 WA	100	132.472	136.66	208.675	281.029
	St Error	0	64.6743	72.1137	12.0306	149.439
	REGRESSION
	R Square	Adjusted R Square	Std. Error of the Estimate
	0.485	0.446	71.0096
	Sum of Squares	df	Mean Square	F	Sig.
	61851.3	1	61851.3	12.266	.004b

## Sheet: 2b OVCAR8_OVCAR8R Annexin
	n=1	n=2	n=3
OVCAR8	Expt 1	Expt 2	Expt 3					Annexin +
WA	n=1	n=2	n=3	AVERAGE	STError		Dose	AVERAGE	STError
0	18	1.85	2.01	7.28667	5.35687		0	7.28667	5.35687
0.5	12.98	2.48	10.89	8.78333	3.2089		0.5	8.78333	3.2089
1	20.58	4.86	11.04	12.16	4.5724		1	12.16	4.5724
2.5	25.89	6.93	9.9	14.24	5.88776		2.5	14.24	5.88776
5	31.11	36.69	16.02	27.94	6.17384		5	27.94	6.17384
7.5	40.08	54.34	14.8	36.4067	11.561		7.5	36.4067	11.561
O85C/OVCAR8R
WA	Expt 1	Expt 2	Expt 3	AVERAGE	STError		Dose	AVERAGE	STError
0	14.59	5.92	3.42	7.97667	3.38451		0	7.97667	3.38451
0.5	14.04	7.27	4.87	8.72667	2.74552		0.5	8.72667	2.74552
1	24.24	8.08	4.22	12.18	6.13209		1	12.18	6.13209
2.5	19.81	7.67	5.09	10.8567	4.5382		2.5	10.8567	4.5382
5	15.57	11.8	5.94	11.1033	2.80168		5	11.1033	2.80168
7.5	14.32	12.92	5.03	10.7567	2.89171		7.5	10.7567	2.89171

## Sheet: 4b Morphology of Cells
	% flatter/cobblestone cells			Transfect wt alpha B or 3xSE..morphology
	ovcar8 aB	ovcar8 3xSE		1A aB	1A 3xSE		7A aB	7A 3xSE
Expt 1	78.4	22.5		69	33.8		57.9	22.2
Expt 2	78.5	20		67.3	23.1		75	18.1
Expt 3	66.7	50		71.2	28.6		64.3	16.7
Extp 4	71.8			74.5	34.8		72.8	14.6
Average	73.85	30.8333		70.5	30.075		67.5	17.9
SdtDev	2.95903	12.2474		1.80208	2.92674		2.82533	0.880814

## Sheet: 5b MigrationAssay
Migration
	Cell Line	OVCAR 8	085C	1A	7A
	Expt 1	4.2	14.8	2.4	4.2
	Expt 2	4.6	22.1	11.8	5.3
	Expt 3	4	11.8	6.9	5.7
	%Migration	4.26667	16.2333	7.03333	5.06667
	Std Dev	0.176383	3.0585	2.71437	0.448454

## Sheet: 7 Apoptosis_Transfection
Apoptosis Transfection Data
	GFP	GFP	GFP	GFP	alpha B	alpha B	alpha B	alpha B	3xSE	3xSE	3xSE	3xSE
OVCAR8	control	2.5WA	control	2.5WA	control	2.5WA	control	2.5WA	control	2.5WA
	nonTx GFP	nonTx GFP	Tx GFP	Tx GFP	ovcar8 non tx aB	ovcar8 non tx aB	ovcar8 aB	ovcar8 aB	ovcar8 non tx 3xse	ovcar8 non tx 3xse	ovcar8 3xSE	ovcar8 3xSE
Expt 1	3.63636	22.5	0	46.7	2.73973	30.4348	0	18.1818	3.52941	24.5283	0	53.8462
Expt 2	2.43902	21.9626	2.22222	40.7407	6.47059	41.4384	5.6338	11.4754	9.1954	31.9	0	54.2
Expt 3	10.5263	22	15	25	3.48837	27.4924	4.81928	10.5263	3.20513	34.8739	6.81818	42.3077
Average	5.5339	22.1542	5.74074	37.4802	4.2329	33.1219	3.48436	13.3945	5.30998	30.4341	2.27273	50.1179
St Error	2.52002	0.173234	4.67386	6.47291	1.13953	4.24411	1.75798	2.40928	1.94496	3.07516	2.27273	3.90646
	GFP	GFP	GFP	GFP	alpha B	alpha B	alpha B	alpha B	3xSE	3xSE	3xSE	3xSE
1A	control	2.5WA	control	2.5WA	control	2.5WA	control	2.5WA	control	2.5WA
	nonTx GFP	nonTx GFP	Tx GFP	Tx GFP	ovcar8 non tx aB	ovcar8 non tx aB	ovcar8 aB	ovcar8 aB	ovcar8 non tx 3xse	ovcar8 non tx 3xse	ovcar8 3xSE	ovcar8 3xSE
Expt 1	5.12821	28.5714	8.69565	55	3.0303	29.4118	8.57143	11.7647	4.84848	26.1538	15.8	33.3333
Expt 2	2.08333	32.6797	8.51064	45.1613	3.59712	48.6339	5.19481	19.5122	5.625	28.6344	7.69231	27.907
Expt 3	6	22.2222	7	26.4151	5.33333	31.0345	9.70874	11.25	5.69106	19.4595	8.95522	50
Average	4.40385	27.8245	8.06876	42.1921	3.98692	36.36	7.82499	14.1756	5.38818	24.7492	10.8158	37.0801
St Error	1.18724	3.04184	0.537044	8.38423	0.692807	6.15477	1.35545	2.67241	0.270521	2.7401	2.5186	6.64716
	GFP	GFP	GFP	GFP	alpha B	alpha B	alpha B	alpha B	3xSE	3xSE	3xSE	3xSE
7A	control	2.5WA	control	2.5WA	control	2.5WA	control	2.5WA	control	2.5WA
	nonTx GFP	nonTx GFP	Tx GFP	Tx GFP	ovcar8 non tx aB	ovcar8 non tx aB	ovcar8 aB	ovcar8 aB	ovcar8 non tx 3xse	ovcar8 non tx 3xse	ovcar8 3xSE	ovcar8 3xSE
Expt 1	3.63636	21.0526	0	30	6.32911	25.974	0	14.2857	9.33333	32.1101	16.6667	17.6471
Expt 2	8.08824	39.1304	16.6667	55.2632	3.42857	23.2877	3.27869	13.4328	7.14286	32.5	5.17241	35.1852
Expt 3	4.57516	37.0968	10.2941	38.4615	3.20513	27.4924	6.81818	10.5263	9.03226	34.8739	12.9032	42.3077
Average	5.43325	32.4266	8.98693	41.2416	4.32094	25.5847	3.36562	12.7483	8.50282	33.1613	11.5808	31.7133
St Error	1.35487	5.71721	4.85544	7.42413	1.00616	1.22932	1.96872	1.13794	0.685511	0.863667	3.38335	7.32751

## Sheet: 8a OVCAR8_OVCAR8R 1A_7AAnnexin
OVCAR8
	Expt 1	Expt 2	Expt 3					Annexin +
WA	n=1	n=2	n=3	AVERAGE	STError		Dose	AVERAGE	STError
0	2.74	1.49	1.3	1.84333	0.782326		0	1.84333	0.782326
0.5	2.4	2.38	1.37	2.05	0.588982		0.5	2.05	0.588982
1	1.69	2.37	1.76	1.94	0.374032		1	1.94	0.374032
2.5	7.07	2.68	2.54	4.09667	2.57593		2.5	4.09667	2.57593
5	13.51	20.97	10.2	14.8933	5.51665		5	14.8933	5.51665
7.5	30.18	56.37	41	42.5167	13.1607		7.5	42.5167	13.1607
O85C/OVCAR8R
WA	Expt 1	Expt 2	Expt 3	AVERAGE	STError		Dose	AVERAGE	STError
	n=1	n=2	n=3
0	5.83	2.28	2.52	3.54333	1.98394		0	3.54333	1.98394
0.5	6.8	2.07	1.99	3.62	2.75425		0.5	3.62	2.75425
1	5.34	2.44	1.96	3.24667	1.8287		1	3.24667	1.8287
2.5	7.99	5.62	4.43	6.01333	1.8123		2.5	6.01333	1.8123
5	7.35	9.55	9.38	8.76	1.22405		5	8.76	1.22405
7.5	11.92	13.86	18.77	14.85	3.53068		7.5	14.85	3.53068
O85C/CRalphaB 1A
WA	Expt 1	Expt 2	Expt 3	AVERAGE	STError		Dose	AVERAGE	STError
	n=1	n=2	n=3
0	0.62	1.6	1.18	1.13333	0.491664		0	1.13333	0.491664
0.5	0.51	4.11	2.86	2.49333	1.82779		0.5	2.49333	1.82779
1	3.7	6.01	2.01	3.90667	2.00799		1	3.90667	2.00799
2.5	12	4.71	5.01	7.24	4.12501		2.5	7.24	4.12501
5	11	15.17	14.26	13.4767	2.19259		5	13.4767	2.19259
7.5	16.48	36.5	23.86	25.6133	10.1245		7.5	25.6133	10.1245
O85C/CRalphaB 1A
WA	Expt 1	Expt 2	Expt 3	AVERAGE	STError		Dose	AVERAGE	STError
	n=1	n=2	n=3
0	3.8	5.03	4.55	4.46	0.619919		0	4.46	0.619919
0.5	2.65	4.89	2.37	3.30333	1.38121		0.5	3.30333	1.38121
1	6.67	4.61	3.2	4.82667	1.74512		1	4.82667	1.74512
2.5	6.39	6.47	4.38	5.74667	1.18424		2.5	5.74667	1.18424
5	14.34	33.76	11.15	19.75	12.2374		5	19.75	12.2374
7.5	31.95	61.89	32.67	42.17	17.0818		7.5	42.17	17.0818

## Sheet: 8b Viobility_PI
		ALL PI/Viobility Negative
	OVCAR8	n=1		n=2		n=3
	WA	n=1	% control	n=2	% control	n=3	% control
	0	99	100	89.46	100	96	100
	1	98.4	99.3939	93.44	104.449	94.67	98.6146
	2.5	96.4	97.3737	93.47	104.482	94.8	98.75
	5	88.9	89.798	85.16	95.1934	87.09	90.7188
	7.5	69.62	70.3232	64.4	71.9875	57.74	60.1458
	O85C
		n=1		n=2		n=3
	0	95.8	100	91.41	100	92.93	100
	1	96.6	100.835	93.85	102.669	92.89	99.957
	2.5	97.5	101.775	94.51	103.391	90.99	97.9124
	5	95.3	99.4781	91.33	99.9125	83.74	90.1108
	7.5	89.95	93.8935	86.25	94.3551	72.12	77.6068
	1A
		n=1		n=2		n=3
	0	97.6	100	92.44	100	84	100
	1	98.05	100.461	89.32	96.6248	87.83	104.56
	2.5	96.5	98.873	93.11	100.725	83.32	99.1905
	5	95.06	97.3975	83.84	90.6967	77.51	92.2738
	7.5	71.2	72.9508	74.11	80.1709	64.78	77.119
	7A
		n=1		n=2		n=3
	0	94.8	100	87.44	100	90.82	100
	1	96.9	102.215	90.85	103.9	86.39	95.1222
	2.5	97.73	103.091	92.09	105.318	90.68	99.8458
	5	90.9	95.8861	77.27	88.3692	83.81	92.2814
	7.5	59.4	62.6582	59.16	67.6578	59.02	64.9857
	% control
		ALL PI /Viobility Negative
	OVCAR8
	WA	n=1	n=2	n=3		average	St Error
		% control	% control	% control
	0	100	100	100		100	0
	1	99.3939	104.449	98.6146		100.819	3.16753
	2.5	97.3737	104.482	98.75		100.202	3.77025
	5	89.798	95.1934	90.7188		91.9034	2.88619
	7.5	70.3232	71.9875	60.1458		67.4855	6.41059
	O85C
	0	100	100	100		100	0
	1	100.835	102.669	99.957		101.154	1.38397
	2.5	101.775	103.391	97.9124		101.026	2.81509
	5	99.4781	99.9125	90.1108		96.5005	5.53784
	7.5	93.8935	94.3551	77.6068		88.6185	9.53918
	1A
	0	100	100	100		100	0
	1	100.461	96.6248	104.56		100.548	3.96807
	2.5	98.873	100.725	99.1905		99.5961	0.99031
	5	97.3975	90.6967	92.2738		93.456	3.50337
	7.5	72.9508	80.1709	77.119		76.7469	3.62441
	7A
	0	100	100	100		100	0
	1	102.215	103.9	95.1222		100.412	4.65823
	2.5	103.091	105.318	99.8458		102.751	2.75177
	5	95.8861	88.3692	92.2814		92.1789	3.7595
	7.5	62.6582	67.6578	64.9857		65.1006	2.50178

## Sheet: 8c_PARP Ratio
PARP Ration
	OVCAR8
		n=1	n=2	n=3	%CL: FL	St Error
		69.7151	16.9479	18.3857	35.0162	30.0587
	0	33.1329	3.08665	21.2999	19.1731	15.1356
	1	8.84065	14.4879	6.59626	10.3083	4.06627
	2.5uM	160.959	73.4722	44.4681	92.9663	60.6427
	5	344.74	117.871	118.277	195.296	130.866
	7.5uM
	085c
		n=1	n=2	n=3	n=4
	0	75.7054	84.331	22.5434	111.394	73.4934	37.2142
	1	68.051	48.3307	51.3655	71.0213	59.6921	11.4983
	2.5uM	130.429	27.3559	40.5441	20.9738	54.8257	51.0567
	5	168.612	107.729	87.066	63.8915	106.825	44.9153
	7.5uM	208.154	114.53	79.6267	55.0217	114.333	67.1438
	1A
		n=1	n=2	n=3	%CL: FL	St Error
	0	11.6453	118.345	62.2779	64.0895	53.373
	1	34.1207	37.354	71.0077	47.8275	20.4274
	2.5uM	41.1692	73.2719	91.8927	68.7779	25.6586
	5	80.0038	58.8596	101.462	81.775	21.3012
	7.5uM	173.412	61.4048	97.8658	110.894	57.1291
	7A
		n=1	n=2	n=3	%CL: FL	St Error
	0	34.4603	92.31	45.439	57.4031	30.7246
	1	18.09	38.1275	42.5092	33.2423	13.0192
	2.5uM	16.8152	45.4985	47.6119	36.6419	17.2029
	5	167.248	77.5463	130.321	126.705	45.0835
	7.5uM	250.332	116.514	99.2758	155.374	82.6865
